# Supplementary material
Source: PubMed Central journal article supplement (PMC6561863)
Supplement: ioz023_supplemental_file.pdf [file ioz023_supplemental_file.pdf]

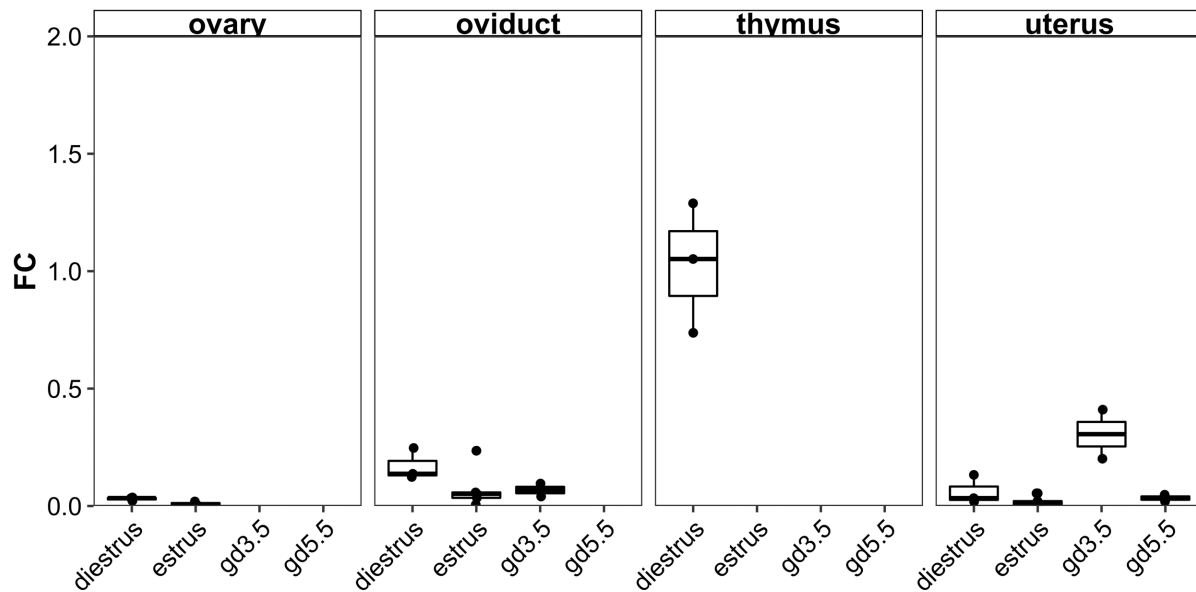

**Supplementary Figure 1. Aire mRNA in thymus and female reproductive organs.**

Real-time quantitative PCR was conducted to measure the expression of Aire transcript from Balb/c female reproductive organs at diestrus (n=3), estrus (n=3), GD3.5 (n=2), and GD5.5 (n=2). GADPH was used as a housekeeping gene to calculate  $\Delta\text{CT}$  values, and the  $\Delta\text{CT}$  value of the diestrus thymus was used to calculate fold change (FC) expression of Aire in each sample. Compared to the Aire transcript levels detected in the thymus, amplification was low or undetectable from all organs examined. FC, fold change; nd, not determined.
